Anesthesiology  
57:557, 1982

### Failure to Correct Nitrous Oxide Toxicity with Folinic Acid

*To the Editor:*—Prolonged administration of N<sub>2</sub>O produces severe marrow depression. This is due to the effect of N<sub>2</sub>O which inactivates vitamin B<sub>12</sub> and leads to severe megaloblastosis, the synthesis of DNA, as measured in the deoxyuridine (dU) suppression test, becoming abnormal. O'Sullivan *et al.*<sup>1</sup> recently have reported prevention of abnormal dU suppression tests and megaloblastic hemopoiesis following the use of N<sub>2</sub>O, by prior administration of folinic acid. This is contrary to our own experience in both humans and the rat.

At the time of writing, we have studied three patients receiving 4.5, 7, and 24 h of 70% N<sub>2</sub>O. dU suppression tests were performed by the method of Metz *et al.*<sup>2</sup> with the modification of Ganeshaguru and Hoffbrand.<sup>3</sup> All had normal preoperative dU values of  $2.9 \pm 1.0\%$  (mean  $\pm$  SD). Less than 10% generally is accepted as a normal result.<sup>3-5</sup> The use of N<sub>2</sub>O produced a rise in dU suppression in all three patients to values of 12.8%, 20.3%, and 21.4%, respectively, despite high doses of folinic acid (table 1), which were administered orally in the second patient (in the same manner as described by O'Sullivan *et al.*) and intravenously in the other two. The patient receiving N<sub>2</sub>O for 24 h developed megaloblastic hemopoiesis, despite folinic acid.

It is not clear how the dU suppression tests were performed by O'Sullivan *et al.*, and, in particular, whether the autologous serum used in the incubation of marrow cells was that taken concurrently with the marrow or obtained prior to folate administration. Serum containing high levels of folate may cause spurious *in vitro* alteration of dU suppression. We raise this point because, in one patient after 24 h N<sub>2</sub>O (without oral folinic), there was a fall in dU suppression value, and the expected reduction in the dU value in normoblastic marrows when folinic is added, was not observed. An abnormal result (12%) in a "control" patient became more abnormal (14%), although he had not received N<sub>2</sub>O. These results differ from other published data.<sup>3,6,7</sup>

It would be unwise for anesthetists to assume on the basis of the report of O'Sullivan *et al.* that the toxicity

of prolonged N<sub>2</sub>O is overcome by these doses of folinic acid, because this has not been our experience.

P. O. SKACEL, M.R.C.P.  
I. CHANARIN, M.D.  
A. HEWLETT, F.F.A.R.C.S.  
J. F. NUNN, M.D., F.F.A.R.C.S.

*Departments of Haematology and Anaesthesia,  
Clinical Research Centre and Northwick Park Hospital,  
Watford Road,  
Harrow,  
Middlesex, HA1 3UJ,  
United Kingdom*

#### REFERENCES

- O'Sullivan H, Jennings F, Ward K, et al: Human bone marrow biochemical function and megaloblastic haematopoiesis after nitrous oxide anaesthesia. *ANESTHESIOLOGY* 55:645-649, 1981
- Metz J, Kelly A, Chapin Swett V, et al: Deranged DNA synthesis in bone marrow from vitamin B12-deficient humans. *Br J Haematol* 14:575-592, 1968
- Ganeshaguru K, Hoffband AV: The effect of deoxyuridine, vitamin B12, folate and alcohol on the uptake of thymidine and on the deoxynucleoside triphosphate concentrations in normal and megaloblastic cells. *Br J Haematol* 40:29-41, 1978
- Zittoun J, Marguet J, Zittoun R: Effect of folate and cobalamin compounds on the deoxyuridine suppression test in vitamin B12 and folate deficiency. *Blood* 51:119-128, 1978
- Wickramasinghe SN, Saunders JE: Results of three years experience with the deoxyuridine suppression test. *Acta Haematol (Basel)* 58:193-206, 1977
- Amess JAL, Rees GM, Burman JF, et al: Megaloblastic haemopoiesis in patients receiving nitrous oxide. *Lancet* 2:339-342, 1978
- Deacon R, Chanarin I, Perry J, Lumb M: Marrow cells from patients with untreated pernicious anaemia cannot use tetra hydrofolate normally. *Br J Haematol* 46:523-528, 1980

(Accepted for publication May 13, 1982.)

#### ADDENDUM

More recently, we have completely prevented these toxic effects of N<sub>2</sub>O with 30 mg folinic acid, iv, every 5 hours throughout a 24-h period of exposure. The dU suppression result was 3.0% before N<sub>2</sub>O and 3.2% after 24 hours without any marrow changes. These confirm the data reported by Nanciekievill and his colleagues at the European Congress of Anaesthesiology in London, September 1982.

TABLE 1. Data of Three Patients Receiving N<sub>2</sub>O with Folinic Acid

| Patient | Duration of N <sub>2</sub> O (h) | Folinic Acid Administration | Serum Folate (ng/ml) |               | dU Suppression (%) |               |
|---------|----------------------------------|-----------------------------|----------------------|---------------|--------------------|---------------|
|         |                                  |                             | Preoperative         | Postoperative | Preoperative       | Postoperative |
| 1       | 4.5                              | 27 mg, iv                   | 6.8                  | 355           | 1.6                | 12.8          |
| 2       | 7                                | 42 mg, po*                  | 4.6                  | 94            | 3.4                | 20.3          |
| 3       | 24                               | 42 mg, iv                   | 7.5                  | 150           | 3.8                | 21.4          |

\* Regime used by O'Sullivan *et al.*
